# Supplementary material for: Effectiveness of aerobic exercise for adults living with HIV: systematic review and meta-analysis using the Cochrane Collaboration protocol
Source: Springer Nature journal article supplement (doi:10.1186/s12879-016-1478-2), 2016-04-26
Supplement: MOESM2 [file 10049648]

**Additional File 2 - GRADE Summary of Finding Table: Aerobic (constant or interval) Exercise or Combined Aerobic and Progressive Resistive Exercise (PRE) Compared with No Exercise for Adults Living with HIV**

| Outcomes                                                            | Illustrative comparative risks (95% CI)                                    |                                                                                                                          | Number of Participants (studies) | Quality of the evidence (GRADE) | Comments                                                                                              |
|---------------------------------------------------------------------|----------------------------------------------------------------------------|--------------------------------------------------------------------------------------------------------------------------|----------------------------------|---------------------------------|-------------------------------------------------------------------------------------------------------|
|                                                                     | No Exercise                                                                | Aerobic Exercise or Combined Aerobic and Progressive Resistive Exercise (PRE) Compared with No Exercise                  |                                  |                                 |                                                                                                       |
| <b>IMMUNOLOGICAL / VIROLOGICAL Viral Load (log10copies)</b>         | The mean Viral Load (log10copies) in the control group was 0               | The mean Viral Load (log10copies) in the intervention group was 0.18 higher (0.13 lower to 0.48 higher)                  | 162 (6 RCTs)                     | ⊕⊕⊕⊖<br>MODERATE                | No significant difference in change in viral load between groups.                                     |
| <b>CARDIORESPIRATORY VO2 Max (ml/kg/min)</b>                        | The mean VO2max (ml/kg/min) in the control group was 0                     | The mean VO2 max (ml/kg/min) in the intervention group was 2.87 higher (1.69 higher to 4.04 higher)                      | 358 (8 RCTs)                     | ⊕⊖⊖⊖<br>VERY LOW                | <b>*Significant improvement in VO2max among exercisers compared with non-exercisers.</b>              |
| <b>STRENGTH Upper Body - Chest Press (1 repetition maximum; kg)</b> | The mean Chest Press (1 repetition maximum; kg) in the control group was 0 | The mean Chest Press (1 repetition maximum; kg) in the intervention group was 11.86 higher (2.37 higher to 21.36 higher) | 44 (2 RCTs)                      | ⊕⊕⊖⊖<br>LOW                     | <b>*Significant improvement in upper body strength among exercisers compared with non-exercisers.</b> |

|                                                                             |                                                                          |                                                                                                                         |                 |                  |                                                                                                                                                    |
|-----------------------------------------------------------------------------|--------------------------------------------------------------------------|-------------------------------------------------------------------------------------------------------------------------|-----------------|------------------|----------------------------------------------------------------------------------------------------------------------------------------------------|
| <b>STRENGTH</b><br><b>Lower Body - Leg Press (1 repetition maximum; kg)</b> | The mean Leg Press (1 repetition maximum; kg) in the control group was 0 | The mean Leg Press (1 repetition maximum; kg) in the intervention group was 50.96 higher (13.01 lower to 114.92 higher) | 44<br>(2 RCTs)  | ⊕⊖⊖⊖<br>VERY LOW | No significant difference between groups, but a trend towards an improvement in lower body strength among exercisers compared with non-exercisers. |
| <b>WEIGHT</b><br><b>Body Weight (kg)</b>                                    | The mean Body Weight (kg) in the control group was 0                     | The mean Body Weight (kg) in the intervention group was 0.38 higher (1.55 lower to 2.31 higher)                         | 151<br>(5 RCTs) | ⊕⊕⊕⊖<br>MODERATE | No significant difference in change in body weight between groups.                                                                                 |
| <b>BODY COMPOSITION</b><br><b>Body Mass Index (kg/m2)</b>                   | The mean Body Mass Index (kg/m2) in the control group was 0              | The mean Body Mass Index (kg/m2) in the intervention group was 0.07 higher (0.52 lower to 0.66 higher)                  | 227<br>(6 RCTs) | ⊕⊕⊕⊕<br>HIGH     | No significant difference in change in body mass index between groups.                                                                             |
| <b>QUALITY OF LIFE</b><br><b>SF-36 Subscale Scores</b>                      | The mean SF-36 Subscale Scores in the control group was 0                | The mean SF-36 Subscale Scores in the intervention group was 6.47 higher (3.18 higher to 9.75 higher)                   | 472<br>(2 RCTs) | ⊕⊖⊖⊖<br>VERY LOW | <b>*Significant improvement in quality of life scores among exercisers compared with non-exercisers.</b>                                           |

**LEGEND:** \*Bold and asterisk text in the comments section indicates significant improvement for the outcome.
